# Supplementary material
Source: MDPI journal article supplement (https://www.mdpi.com/2571-8797/4/3/45)
Supplement: s1 [file s1]

## Electronic Supplementary Information

**Journal name**

**Manuscript Title**

Effect of various growth medium on the physiology and *denovo* lipogenesis of a freshwater microalga *Scenedesmus rotundus*-MG910488 under autotrophic condition

## **Content**

**Table S1. Effect of different autotrophic growth medium on the Morphology of *Scenedesmus rotundus*-MG910488** **Page No. 03**

**Table S2. Impact of different autotrophic growth media on the cell count of *Scenedesmus rotundus*-MG910488** **Page No. 03**

**Table S3. Growth rates, doubling per day and generation time of *Scenedesmus rotundus*-MG910488 grown in various nitrate concentrations** **Page No. 04**

**Table S4. Calculation of photosynthetic pigments content in µg/ml of *Scenedesmus rotundus*-MG910488** **Page No. 05-14**

**Table S5. Calculation of Biomass content and Biomass productivity of *Scenedesmus rotundus*-MG910488** **Page No. 15**

**Table S6 Estimation of the lipid content and lipid productivity of *Scenedesmus rotundus*-MG910488** **Page No. 16**

**Figure S1. The GCMS of fatty acid methyl ester sample obtained from the *Scenedesmus rotundus*- MG910488** **Page No. 17**

**Figure S2. MS fragmentation patterns of fatty acid methyl ester of *Scenedesmus rotundus*-MG910488** **Page No. 18-19**

**Figure S3. The FTIR spectrum of Fatty Acid Methyl Ester sample obtained from the *Scenedesmus rotundus*-MG910488** **Page No. 20**

**Table S1. Effect of different autotrophic growth medium on the morphology of *Scenedesmus rotundus*-MG910488**

| Different Media  | Cell diameter (µm)-Length |       |       |       |      | Cell diameter (µm)-Width |      |       |       |      |
|------------------|---------------------------|-------|-------|-------|------|--------------------------|------|-------|-------|------|
|                  | T1                        | T2    | T3    | Mean  | SD   | T1                       | T2   | T3    | Mean  | SD   |
| <b>BBM</b>       | 14.00                     | 15.75 | 15.75 | 15.17 | 1.01 | 7.00                     | 8.75 | 6.30  | 7.35  | 1.26 |
| <b>CHU-10</b>    | 15.75                     | 17.50 | 15.75 | 16.33 | 1.01 | 7.00                     | 8.75 | 10.50 | 8.75  | 1.75 |
| <b>Fogg's</b>    | 16.80                     | 17.50 | 17.50 | 17.27 | 0.40 | 8.75                     | 7.00 | 9.80  | 8.52  | 1.41 |
| <b>BG-11</b>     | 17.50                     | 19.25 | 18.75 | 18.50 | 0.90 | 10.5                     | 10.5 | 8.75  | 9.92  | 1.01 |
| <b>CFTRI</b>     | 17.50                     | 17.50 | 15.75 | 16.92 | 1.01 | 8.75                     | 9.8  | 8.75  | 9.10  | 0.61 |
| <b>Zarrouk's</b> | 17.50                     | 19.25 | 17.50 | 18.08 | 1.01 | 10.5                     | 9.75 | 9.80  | 10.02 | 0.42 |

**Table S2. Impact of different autotrophic growth media on the cell count of *Scenedesmus rotundus*-MG910488**

| No. of Cell x 10 <sup>6</sup> mL <sup>-1</sup> |            |             |             |             |             |             |
|------------------------------------------------|------------|-------------|-------------|-------------|-------------|-------------|
| Media                                          | BBM        | CHU-10      | Fogg's      | CFTRI       | BG-11       | Zarrouk's   |
| Days                                           | FINAL      | FINAL       | FINAL       | FINAL       | FINAL       | FINAL       |
| 0                                              | 2.21±0.23  | 2.32±0.20   | 2.21±0.08   | 2.14±0.07   | 2.14±0.20   | 2.45±0.08   |
| 3                                              | 5.49±0.12  | 6.38±1.25   | 7.14±0.18   | 15.17±1.38  | 13.19±1.653 | 19.15±1.23  |
| 6                                              | 8.37±0.28  | 13.04±1.50  | 18.86±1.42  | 20.5±1.32   | 39.17±1.02  | 44.12±0.92  |
| 9                                              | 25.18±0.16 | 35.50±1.45  | 42.03±1.78  | 57.78±0.71  | 75.13±1.22  | 88.16±1.82  |
| 12                                             | 45.53±0.16 | 51.52±1.10  | 67.38±1.72  | 84.23±1.75  | 118.23±0.98 | 139.52±1.69 |
| 15                                             | 55.89±0.06 | 74.08±1.09  | 86.27±1.55  | 108.21±0.98 | 143.17±1.85 | 167.11±5.98 |
| 18                                             | 57.48±0.16 | 81.14±2.73  | 115.76±1.56 | 138.82±1.99 | 159.41±1.43 | 181.51±3.04 |
| 21                                             | 62.39±0.13 | 106.63±2.26 | 123.64±2.46 | 149.18±2.05 | 175.22±1.63 | 197.43±1.37 |
| 24                                             | 65.52±0.31 | 115.87±1.11 | 132.90±2.60 | 166.51±1.25 | 192.31±2.10 | 207.27±1.34 |
| 27                                             | 68.29±0.09 | 118.49±1.62 | 139.87±1.59 | 172.53±2.42 | 200.28±1.89 | 215.21±1.42 |
| 30                                             | 65.19±0.44 | 114.55±2.98 | 140.11±1.70 | 169.10±0.97 | 204.02±1.74 | 218.37±1.04 |

**Table S3. Growth rates, doubling per day and generation time of *Scenedesmus rotundus*-MG910488 grown in various growth medium**

| Different Media  | (μ) Specific growth rate  |        |       |       |       |             |
|------------------|---------------------------|--------|-------|-------|-------|-------------|
|                  | T1                        | T2     | T3    | Mean  | SD    | Final Data  |
| <b>BBM</b>       | 0.194                     | 0.196  | 0.197 | 0.196 | 0.002 | 0.196±0.002 |
| <b>CHU-10</b>    | 0.224                     | 0.228  | 0.230 | 0.227 | 0.003 | 0.227±0.003 |
| <b>Fogg's</b>    | 0.234                     | 0.236  | 0.232 | 0.234 | 0.002 | 0.234±0.002 |
| <b>CFTRI</b>     | 0.239                     | 0.241  | 0.232 | 0.237 | 0.005 | 0.237±0.005 |
| <b>BG-11</b>     | 0.287                     | 0.282  | 0.297 | 0.289 | 0.008 | 0.289±0.008 |
| <b>Zarrouk's</b> | 0.309                     | 0.3151 | 0.311 | 0.312 | 0.003 | 0.312±0.003 |
| Different Media  | (T) Doubling time in days |        |       |       |       |             |
|                  | T1                        | T2     | T3    | Mean  | SD    | Final Data  |
| <b>BBM</b>       | 3.57                      | 3.53   | 3.51  | 3.54  | 0.031 | 3.54±0.031  |
| <b>CHU-10</b>    | 3.09                      | 3.03   | 3.01  | 3.04  | 0.042 | 3.04±0.042  |
| <b>Fogg's</b>    | 2.96                      | 2.93   | 2.98  | 2.96  | 0.025 | 2.96±0.025  |
| <b>CFTRI</b>     | 2.90                      | 2.87   | 2.98  | 2.92  | 0.057 | 2.92±0.057  |
| <b>BG-11</b>     | 2.41                      | 2.45   | 2.33  | 2.40  | 0.061 | 2.40±0.061  |
| <b>Zarrouk's</b> | 2.24                      | 2.20   | 2.22  | 2.22  | 0.022 | 2.22±0.022  |
| Different Media  | (K) Doubling per day      |        |       |       |       |             |
|                  | T1                        | T2     | T3    | Mean  | SD    | Final Data  |
| <b>BBM</b>       | 0.279                     | 0.282  | 0.284 | 0.282 | 0.003 | 0.282±0.003 |
| <b>CHU-10</b>    | 0.323                     | 0.328  | 0.331 | 0.327 | 0.004 | 0.327±0.004 |
| <b>Fogg's</b>    | 0.337                     | 0.340  | 0.334 | 0.337 | 0.003 | 0.337±0.003 |
| <b>CFTRI</b>     | 0.344                     | 0.347  | 0.334 | 0.342 | 0.007 | 0.342±0.007 |
| <b>BG-11</b>     | 0.414                     | 0.406  | 0.428 | 0.416 | 0.011 | 0.416±0.011 |
| <b>Zarrouk's</b> | 0.446                     | 0.455  | 0.450 | 0.450 | 0.004 | 0.450±0.004 |

**Table S4. Effect of different growth medium on the content of photosynthetic pigments of *Scenedesmus rotundus*-MG910488**

| BBM       |         |                    |       |      |             |             |             |             |             |               |
|-----------|---------|--------------------|-------|------|-------------|-------------|-------------|-------------|-------------|---------------|
| Days      | Samples | OD at different nm |       |      | Chl-a       | Chl-b       | Chl a+b     | Caro        | Chl a/b     | Caro/ Chl a+b |
|           |         | 652.4              | 665.2 | 470  |             |             |             |             |             |               |
| <b>0</b>  | 1       | 0.03               | 0.06  | 0.06 | 0.65        | 0.20        | 0.85        | 0.18        | 3.24        | 0.21          |
|           | 2       | 0.03               | 0.05  | 0.06 | 0.49        | 0.30        | 0.79        | 0.11        | 1.62        | 0.14          |
|           | 3       | 0.03               | 0.05  | 0.07 | 0.52        | 0.38        | 0.89        | 0.11        | 1.37        | 0.13          |
|           |         |                    |       |      | <b>MEAN</b> | <b>0.55</b> | <b>0.29</b> | <b>0.84</b> | <b>0.13</b> | <b>2.08</b>   |
|           |         |                    |       |      | <b>STD</b>  | <b>0.09</b> | <b>0.09</b> | <b>0.05</b> | <b>0.04</b> | <b>1.02</b>   |
| <b>3</b>  | 1       | 0.06               | 0.10  | 0.12 | 1.13        | 0.54        | 1.67        | 0.28        | 2.11        | 0.17          |
|           | 2       | 0.08               | 0.12  | 0.12 | 1.29        | 0.75        | 2.04        | 0.16        | 1.71        | 0.08          |
|           | 3       | 0.06               | 0.11  | 0.11 | 1.27        | 0.31        | 1.58        | 0.32        | 4.11        | 0.20          |
|           |         |                    |       |      | <b>MEAN</b> | <b>1.23</b> | <b>0.53</b> | <b>1.76</b> | <b>0.25</b> | <b>2.64</b>   |
|           |         |                    |       |      | <b>STD</b>  | <b>0.09</b> | <b>0.22</b> | <b>0.25</b> | <b>0.08</b> | <b>1.29</b>   |
| <b>6</b>  | 1       | 0.08               | 0.14  | 0.16 | 1.57        | 0.60        | 2.17        | 0.42        | 2.61        | 0.20          |
|           | 2       | 0.09               | 0.16  | 0.16 | 1.73        | 0.84        | 2.57        | 0.33        | 2.07        | 0.13          |
|           | 3       | 0.09               | 0.15  | 0.16 | 1.68        | 0.70        | 2.38        | 0.36        | 2.38        | 0.15          |
|           |         |                    |       |      | <b>MEAN</b> | <b>1.66</b> | <b>0.71</b> | <b>2.37</b> | <b>0.37</b> | <b>2.35</b>   |
|           |         |                    |       |      | <b>STD</b>  | <b>0.08</b> | <b>0.12</b> | <b>0.20</b> | <b>0.05</b> | <b>0.27</b>   |
| <b>9</b>  | 1       | 0.13               | 0.20  | 0.27 | 2.11        | 1.44        | 3.55        | 0.50        | 1.47        | 0.14          |
|           | 2       | 0.12               | 0.20  | 0.26 | 2.29        | 1.02        | 3.31        | 0.69        | 2.23        | 0.21          |
|           | 3       | 0.12               | 0.19  | 0.26 | 2.16        | 1.04        | 3.19        | 0.66        | 2.07        | 0.21          |
|           |         |                    |       |      | <b>MEAN</b> | <b>2.18</b> | <b>1.17</b> | <b>3.35</b> | <b>0.62</b> | <b>1.92</b>   |
|           |         |                    |       |      | <b>STD</b>  | <b>0.09</b> | <b>0.24</b> | <b>0.18</b> | <b>0.10</b> | <b>0.41</b>   |
| <b>12</b> | 1       | 0.15               | 0.23  | 0.33 | 2.47        | 1.55        | 4.02        | 0.73        | 1.60        | 0.18          |
|           | 2       | 0.14               | 0.24  | 0.32 | 2.77        | 1.09        | 3.87        | 0.92        | 2.53        | 0.24          |
|           | 3       | 0.15               | 0.24  | 0.32 | 2.52        | 1.66        | 4.18        | 0.63        | 1.52        | 0.15          |
|           |         |                    |       |      | <b>MEAN</b> | <b>2.59</b> | <b>1.43</b> | <b>4.02</b> | <b>0.76</b> | <b>1.88</b>   |
|           |         |                    |       |      | <b>STD</b>  | <b>0.16</b> | <b>0.30</b> | <b>0.16</b> | <b>0.15</b> | <b>0.56</b>   |
| <b>15</b> | 1       | 0.17               | 0.29  | 0.37 | 3.22        | 1.48        | 4.70        | 0.93        | 2.18        | 0.20          |
|           | 2       | 0.19               | 0.29  | 0.36 | 3.14        | 1.96        | 5.11        | 0.68        | 1.60        | 0.13          |
|           | 3       | 0.18               | 0.30  | 0.36 | 3.37        | 1.45        | 4.82        | 0.90        | 2.33        | 0.19          |
|           |         |                    |       |      | <b>MEAN</b> | <b>3.25</b> | <b>1.63</b> | <b>4.87</b> | <b>0.84</b> | <b>2.04</b>   |
|           |         |                    |       |      | <b>STD</b>  | <b>0.12</b> | <b>0.29</b> | <b>0.21</b> | <b>0.14</b> | <b>0.38</b>   |
| <b>18</b> | 1       | 0.18               | 0.32  | 0.40 | 3.64        | 1.38        | 5.02        | 1.13        | 2.64        | 0.23          |
|           | 2       | 0.19               | 0.31  | 0.39 | 3.44        | 1.79        | 5.23        | 0.88        | 1.92        | 0.17          |
|           | 3       | 0.20               | 0.31  | 0.39 | 3.31        | 2.09        | 5.40        | 0.75        | 1.58        | 0.14          |
|           |         |                    |       |      | <b>MEAN</b> | <b>3.46</b> | <b>1.76</b> | <b>5.22</b> | <b>0.92</b> | <b>2.05</b>   |
|           |         |                    |       |      | <b>STD</b>  | <b>0.17</b> | <b>0.36</b> | <b>0.19</b> | <b>0.19</b> | <b>0.54</b>   |
| <b>21</b> | 1       | 0.18               | 0.32  | 0.41 | 3.68        | 1.30        | 4.97        | 1.20        | 2.84        | 0.24          |
|           | 2       | 0.20               | 0.32  | 0.41 | 3.55        | 1.84        | 5.40        | 0.95        | 1.93        | 0.18          |
|           | 3       | 0.21               | 0.33  | 0.41 | 3.52        | 2.26        | 5.78        | 0.75        | 1.55        | 0.13          |
|           |         |                    |       |      | <b>MEAN</b> | <b>3.58</b> | <b>1.80</b> | <b>5.38</b> | <b>0.97</b> | <b>2.11</b>   |
|           |         |                    |       |      | <b>STD</b>  | <b>0.08</b> | <b>0.49</b> | <b>0.40</b> | <b>0.23</b> | <b>0.66</b>   |
| <b>24</b> | 1       | 0.21               | 0.34  | 0.42 | 3.69        | 2.01        | 5.69        | 0.93        | 1.84        | 0.16          |
|           | 2       | 0.20               | 0.33  | 0.42 | 3.67        | 1.74        | 5.41        | 1.03        | 2.11        | 0.19          |
|           | 3       | 0.20               | 0.32  | 0.43 | 3.54        | 1.98        | 5.53        | 0.97        | 1.78        | 0.18          |
|           |         |                    |       |      | <b>MEAN</b> | <b>3.63</b> | <b>1.91</b> | <b>5.54</b> | <b>0.98</b> | <b>1.91</b>   |

|    |   |      |      |      |      |      |      |      |      |      |      |
|----|---|------|------|------|------|------|------|------|------|------|------|
|    |   |      |      |      | STD  | 0.08 | 0.15 | 0.14 | 0.05 | 0.18 | 0.01 |
| 27 | 1 | 0.21 | 0.33 | 0.42 |      | 3.50 | 2.23 | 5.73 | 0.82 | 1.57 | 0.14 |
|    | 2 | 0.20 | 0.34 | 0.43 |      | 3.84 | 1.59 | 5.42 | 1.15 | 2.42 | 0.21 |
|    | 3 | 0.21 | 0.34 | 0.44 |      | 3.78 | 2.02 | 5.80 | 1.00 | 1.87 | 0.17 |
|    |   |      |      |      | MEAN | 3.71 | 1.94 | 5.65 | 0.99 | 1.96 | 0.18 |
|    |   |      |      |      | STD  | 0.18 | 0.33 | 0.20 | 0.16 | 0.43 | 0.03 |
| 30 | 1 | 0.21 | 0.35 | 0.44 |      | 3.87 | 1.94 | 5.81 | 1.03 | 1.99 | 0.18 |
|    | 2 | 0.22 | 0.36 | 0.44 |      | 3.97 | 1.98 | 5.95 | 1.03 | 2.01 | 0.17 |
|    | 3 | 0.22 | 0.34 | 0.45 |      | 3.73 | 2.12 | 5.85 | 1.01 | 1.76 | 0.17 |
|    |   |      |      |      | MEAN | 3.86 | 2.01 | 5.87 | 1.02 | 1.92 | 0.17 |
|    |   |      |      |      | STD  | 0.12 | 0.09 | 0.07 | 0.01 | 0.14 | 0.00 |

**CHU-10 Medium**

| Days | Samples | OD at different nm |      |      | Chl-a | Chl-b | Chl a+b | Caro | Chl a/b | Caro/ Chl a+b |      |
|------|---------|--------------------|------|------|-------|-------|---------|------|---------|---------------|------|
|      |         | 652                | 665  | 470  |       |       |         |      |         |               |      |
| 0    | 1       | 0.03               | 0.06 | 0.07 | MEAN  | 0.65  | 0.25    | 0.90 | 0.20    | 2.56          | 0.22 |
|      | 2       | 0.04               | 0.05 | 0.08 |       | 0.43  | 0.61    | 1.04 | 0.06    | 0.70          | 0.06 |
|      | 3       | 0.03               | 0.06 | 0.08 |       | 0.69  | 0.17    | 0.86 | 0.25    | 4.02          | 0.30 |
|      |         |                    |      |      |       | 0.59  | 0.35    | 0.93 | 0.17    | 2.43          | 0.19 |
|      |         |                    |      |      |       | 0.14  | 0.23    | 0.10 | 0.10    | 1.66          | 0.12 |
| 3    | 1       | 0.09               | 0.13 | 0.14 | MEAN  | 1.44  | 0.90    | 2.34 | 0.19    | 1.60          | 0.08 |
|      | 2       | 0.08               | 0.15 | 0.13 |       | 1.73  | 0.45    | 2.18 | 0.38    | 3.88          | 0.17 |
|      | 3       | 0.07               | 0.13 | 0.13 |       | 1.49  | 0.52    | 2.01 | 0.31    | 2.88          | 0.15 |
|      |         |                    |      |      |       | 1.55  | 0.62    | 2.17 | 0.29    | 2.78          | 0.14 |
|      |         |                    |      |      |       | 0.16  | 0.24    | 0.17 | 0.10    | 1.14          | 0.05 |
| 6    | 1       | 0.13               | 0.23 | 0.28 | MEAN  | 2.64  | 0.88    | 3.52 | 0.83    | 3.00          | 0.23 |
|      | 2       | 0.14               | 0.22 | 0.27 |       | 2.31  | 1.59    | 3.90 | 0.47    | 1.45          | 0.12 |
|      | 3       | 0.13               | 0.21 | 0.28 |       | 2.38  | 1.20    | 3.57 | 0.70    | 1.99          | 0.19 |
|      |         |                    |      |      |       | 2.44  | 1.22    | 3.67 | 0.66    | 2.15          | 0.18 |
|      |         |                    |      |      |       | 0.17  | 0.36    | 0.21 | 0.18    | 0.79          | 0.06 |
| 9    | 1       | 0.17               | 0.29 | 0.38 | MEAN  | 3.30  | 1.44    | 4.73 | 1.00    | 2.30          | 0.21 |
|      | 2       | 0.19               | 0.29 | 0.38 |       | 3.07  | 2.06    | 5.13 | 0.72    | 1.49          | 0.14 |
|      | 3       | 0.19               | 0.28 | 0.38 |       | 3.00  | 2.01    | 5.02 | 0.76    | 1.49          | 0.15 |
|      |         |                    |      |      |       | 3.12  | 1.84    | 4.96 | 0.83    | 1.76          | 0.17 |
|      |         |                    |      |      |       | 0.15  | 0.35    | 0.20 | 0.16    | 0.46          | 0.04 |
| 12   | 1       | 0.21               | 0.36 | 0.46 | MEAN  | 4.02  | 1.81    | 5.82 | 1.18    | 2.22          | 0.20 |
|      | 2       | 0.22               | 0.33 | 0.46 |       | 3.58  | 2.31    | 5.89 | 0.96    | 1.55          | 0.16 |
|      | 3       | 0.21               | 0.35 | 0.45 |       | 3.89  | 1.88    | 5.76 | 1.11    | 2.07          | 0.19 |
|      |         |                    |      |      |       | 3.83  | 2.00    | 5.82 | 1.08    | 1.95          | 0.19 |
|      |         |                    |      |      |       | 0.22  | 0.27    | 0.06 | 0.11    | 0.35          | 0.02 |
| 15   | 1       | 0.22               | 0.37 | 0.49 | MEAN  | 4.05  | 2.06    | 6.11 | 1.20    | 1.97          | 0.20 |
|      | 2       | 0.23               | 0.37 | 0.47 |       | 4.07  | 2.27    | 6.34 | 1.04    | 1.79          | 0.16 |
|      | 3       | 0.22               | 0.37 | 0.48 |       | 4.16  | 1.81    | 5.96 | 1.28    | 2.30          | 0.21 |
|      |         |                    |      |      |       | 4.09  | 2.05    | 6.14 | 1.17    | 2.02          | 0.19 |
|      |         |                    |      |      |       | 0.06  | 0.23    | 0.19 | 0.12    | 0.26          | 0.03 |
| 18   | 1       | 0.27               | 0.43 | 0.53 | MEAN  | 4.71  | 2.56    | 7.27 | 1.14    | 1.84          | 0.16 |
|      | 2       | 0.25               | 0.44 | 0.53 |       | 5.01  | 1.88    | 6.89 | 1.48    | 2.66          | 0.22 |
|      | 3       | 0.26               | 0.43 | 0.53 |       | 4.76  | 2.41    | 7.17 | 1.21    | 1.98          | 0.17 |
|      |         |                    |      |      |       | 4.83  | 2.28    | 7.11 | 1.28    | 2.16          | 0.18 |
|      |         |                    |      |      |       | 0.16  | 0.36    | 0.20 | 0.18    | 0.44          | 0.03 |
| 21   | 1       | 0.28               | 0.43 | 0.55 | MEAN  | 4.56  | 3.11    | 7.67 | 0.98    | 1.47          | 0.13 |
|      | 2       | 0.27               | 0.45 | 0.57 |       | 5.02  | 2.31    | 7.32 | 1.44    | 2.18          | 0.20 |
|      | 3       | 0.26               | 0.46 | 0.56 |       | 5.25  | 1.81    | 7.06 | 1.65    | 2.90          | 0.23 |
|      |         |                    |      |      |       | 4.95  | 2.41    | 7.35 | 1.36    | 2.18          | 0.19 |
|      |         |                    |      |      |       |       |         |      |         |               |      |

|               |         |                    |       |      |      |       |       |         |      |         |               |
|---------------|---------|--------------------|-------|------|------|-------|-------|---------|------|---------|---------------|
| 24            | 1       | 0.32               | 0.53  | 0.62 | STD  | 0.35  | 0.66  | 0.31    | 0.34 | 0.72    | 0.05          |
|               | 2       | 0.32               | 0.54  | 0.61 |      | 5.91  | 2.81  | 8.71    | 1.45 | 2.10    | 0.17          |
|               | 3       | 0.32               | 0.52  | 0.62 |      | 6.04  | 2.63  | 8.67    | 1.46 | 2.30    | 0.17          |
|               |         |                    |       |      |      | 5.73  | 3.05  | 8.77    | 1.31 | 1.88    | 0.15          |
|               |         |                    |       |      | MEAN | 5.89  | 2.83  | 8.72    | 1.40 | 2.09    | 0.16          |
|               |         |                    |       |      | STD  | 0.16  | 0.21  | 0.05    | 0.08 | 0.21    | 0.01          |
| 27            | 1       | 0.33               | 0.55  | 0.65 |      | 6.20  | 2.90  | 9.10    | 1.53 | 2.13    | 0.17          |
|               | 2       | 0.34               | 0.55  | 0.64 |      | 6.03  | 3.16  | 9.19    | 1.36 | 1.91    | 0.15          |
|               | 3       | 0.33               | 0.54  | 0.66 |      | 6.00  | 2.93  | 8.93    | 1.55 | 2.05    | 0.17          |
|               |         |                    |       |      |      | 6.07  | 3.00  | 9.07    | 1.48 | 2.03    | 0.16          |
|               |         |                    |       |      | MEAN | 6.07  | 3.00  | 9.07    | 1.48 | 2.03    | 0.16          |
|               |         |                    |       |      | STD  | 0.11  | 0.14  | 0.13    | 0.10 | 0.12    | 0.01          |
| 30            | 1       | 0.34               | 0.58  | 0.65 |      | 6.51  | 2.88  | 9.38    | 1.54 | 2.26    | 0.16          |
|               | 2       | 0.36               | 0.57  | 0.67 |      | 6.18  | 3.54  | 9.71    | 1.31 | 1.75    | 0.14          |
|               | 3       | 0.34               | 0.57  | 0.68 |      | 6.44  | 2.83  | 9.27    | 1.70 | 2.27    | 0.18          |
|               |         |                    |       |      |      | 6.37  | 3.08  | 9.46    | 1.52 | 2.09    | 0.16          |
|               |         |                    |       |      | MEAN | 6.37  | 3.08  | 9.46    | 1.52 | 2.09    | 0.16          |
|               |         |                    |       |      | STD  | 0.17  | 0.39  | 0.23    | 0.19 | 0.30    | 0.02          |
| Fogg's Medium |         |                    |       |      |      |       |       |         |      |         |               |
| Days          | Samples | OD at different nm |       |      |      | Chl-a | Chl-b | Chl a+b | Caro | Chl a/b | Caro/ Chl a+b |
|               |         | 652.4              | 665.2 | 470  |      |       |       |         |      |         |               |
| 0             | 1       | 0.03               | 0.05  | 0.07 |      | 0.54  | 0.38  | 0.92    | 0.13 | 1.43    | 0.14          |
|               | 2       | 0.03               | 0.05  | 0.08 |      | 0.52  | 0.27  | 0.79    | 0.21 | 1.92    | 0.27          |
|               | 3       | 0.04               | 0.06  | 0.08 |      | 0.62  | 0.41  | 1.03    | 0.17 | 1.52    | 0.16          |
|               |         |                    |       |      |      | 0.56  | 0.35  | 0.91    | 0.17 | 1.62    | 0.19          |
|               |         |                    |       |      | MEAN | 0.56  | 0.35  | 0.91    | 0.17 | 1.62    | 0.19          |
|               |         |                    |       |      | SD   | 0.05  | 0.07  | 0.12    | 0.04 | 0.26    | 0.07          |
| 3             | 1       | 0.08               | 0.14  | 0.17 |      | 1.55  | 0.72  | 2.27    | 0.40 | 2.15    | 0.18          |
|               | 2       | 0.08               | 0.15  | 0.16 |      | 1.73  | 0.45  | 2.18    | 0.48 | 3.88    | 0.22          |
|               | 3       | 0.10               | 0.15  | 0.17 |      | 1.65  | 0.93  | 2.59    | 0.31 | 1.78    | 0.12          |
|               |         |                    |       |      |      | 1.65  | 0.70  | 2.34    | 0.40 | 2.60    | 0.17          |
|               |         |                    |       |      | MEAN | 1.65  | 0.70  | 2.34    | 0.40 | 2.60    | 0.17          |
|               |         |                    |       |      | SD   | 0.09  | 0.24  | 0.21    | 0.08 | 1.12    | 0.05          |
| 6             | 1       | 0.13               | 0.22  | 0.33 |      | 2.42  | 1.24  | 3.65    | 0.87 | 1.95    | 0.24          |
|               | 2       | 0.16               | 0.25  | 0.34 |      | 2.79  | 1.49  | 4.28    | 0.79 | 1.88    | 0.19          |
|               | 3       | 0.17               | 0.27  | 0.33 |      | 2.95  | 1.55  | 4.50    | 0.73 | 1.91    | 0.16          |
|               |         |                    |       |      |      | 2.72  | 1.42  | 4.14    | 0.80 | 1.91    | 0.20          |
|               |         |                    |       |      | MEAN | 2.72  | 1.42  | 4.14    | 0.80 | 1.91    | 0.20          |
|               |         |                    |       |      | SD   | 0.27  | 0.16  | 0.44    | 0.07 | 0.04    | 0.04          |
| 9             | 1       | 0.19               | 0.34  | 0.42 |      | 3.82  | 1.49  | 5.32    | 1.14 | 2.56    | 0.21          |
|               | 2       | 0.22               | 0.33  | 0.43 |      | 3.51  | 2.37  | 5.88    | 0.79 | 1.48    | 0.13          |
|               | 3       | 0.21               | 0.34  | 0.42 |      | 3.81  | 1.86  | 5.68    | 1.00 | 2.04    | 0.18          |
|               |         |                    |       |      |      | 3.72  | 1.91  | 5.63    | 0.98 | 2.03    | 0.17          |
|               |         |                    |       |      | MEAN | 3.72  | 1.91  | 5.63    | 0.98 | 2.03    | 0.17          |
|               |         |                    |       |      | SD   | 0.18  | 0.44  | 0.29    | 0.18 | 0.54    | 0.04          |
| 12            | 1       | 0.24               | 0.39  | 0.52 |      | 4.42  | 2.06  | 6.48    | 1.35 | 2.15    | 0.21          |
|               | 2       | 0.25               | 0.38  | 0.52 |      | 4.09  | 2.79  | 6.89    | 0.99 | 1.47    | 0.14          |
|               | 3       | 0.23               | 0.40  | 0.53 |      | 4.54  | 1.79  | 6.33    | 1.51 | 2.53    | 0.24          |
|               |         |                    |       |      |      | 4.35  | 2.21  | 6.56    | 1.28 | 2.05    | 0.20          |
|               |         |                    |       |      | MEAN | 4.35  | 2.21  | 6.56    | 1.28 | 2.05    | 0.20          |
|               |         |                    |       |      | SD   | 0.23  | 0.52  | 0.29    | 0.27 | 0.54    | 0.05          |
| 15            | 1       | 0.27               | 0.44  | 0.59 |      | 4.82  | 2.61  | 7.44    | 1.39 | 1.84    | 0.19          |
|               | 2       | 0.27               | 0.43  | 0.59 |      | 4.68  | 2.61  | 7.30    | 1.38 | 1.79    | 0.19          |
|               | 3       | 0.27               | 0.44  | 0.59 |      | 4.77  | 2.66  | 7.43    | 1.39 | 1.79    | 0.19          |
|               |         |                    |       |      |      | 4.76  | 2.63  | 7.39    | 1.39 | 1.81    | 0.19          |
|               |         |                    |       |      | MEAN | 4.76  | 2.63  | 7.39    | 1.39 | 1.81    | 0.19          |
|               |         |                    |       |      | SD   | 0.07  | 0.03  | 0.08    | 0.00 | 0.03    | 0.00          |
| 18            | 1       | 0.32               | 0.49  | 0.68 |      | 5.24  | 3.42  | 8.66    | 1.40 | 1.53    | 0.16          |
|               | 2       | 0.31               | 0.49  | 0.66 |      | 5.25  | 3.23  | 8.48    | 1.43 | 1.63    | 0.17          |
|               | 3       | 0.30               | 0.49  | 0.68 |      | 5.48  | 2.66  | 8.14    | 1.78 | 2.06    | 0.22          |
|               |         |                    |       |      |      | 5.32  | 3.10  | 8.42    | 1.54 | 1.74    | 0.18          |
|               |         |                    |       |      | MEAN | 5.32  | 3.10  | 8.42    | 1.54 | 1.74    | 0.18          |

|    |   |      |      |      |      |      |      |       |       |      |      |
|----|---|------|------|------|------|------|------|-------|-------|------|------|
|    |   |      |      |      | SD   | 0.14 | 0.40 | 0.26  | 0.21  | 0.28 | 0.03 |
| 21 | 1 | 0.33 | 0.53 | 0.72 |      | 5.75 | 3.26 | 9.01  | 1.65  | 1.76 | 0.18 |
|    | 2 | 0.33 | 0.52 | 0.71 |      | 5.70 | 3.25 | 8.95  | 1.64  | 1.75 | 0.18 |
|    | 3 | 0.32 | 0.52 | 0.73 |      | 5.65 | 3.14 | 8.79  | 1.76  | 1.80 | 0.20 |
|    |   |      |      |      | MEAN | 5.70 | 3.22 | 8.92  | 1.68  | 1.77 | 0.19 |
|    |   |      |      |      | SD   | 0.05 | 0.07 | 0.11  | 0.06  | 0.03 | 0.01 |
| 24 | 1 | 0.34 | 0.54 | 0.74 | SD   | 5.84 | 3.51 | 9.35  | 1.65  | 1.67 | 0.18 |
|    | 2 | 0.35 | 0.55 | 0.74 |      | 5.96 | 3.51 | 9.46  | 1.64  | 1.70 | 0.17 |
|    | 3 | 0.33 | 0.54 | 0.73 |      | 6.00 | 3.09 | 9.08  | 1.80  | 1.94 | 0.20 |
|    |   |      |      |      |      | MEAN | 5.93 | 3.37  | 9.30  | 1.70 | 1.77 |
|    |   |      |      |      | SD   | 0.08 | 0.24 | 0.20  | 0.09  | 0.15 | 0.01 |
| 27 | 1 | 0.36 | 0.60 | 0.77 | SD   | 6.66 | 3.20 | 9.86  | 1.92  | 2.08 | 0.19 |
|    | 2 | 0.37 | 0.59 | 0.76 |      | 6.44 | 3.50 | 9.94  | 1.72  | 1.84 | 0.17 |
|    | 3 | 0.37 | 0.58 | 0.77 |      | 6.39 | 3.60 | 9.99  | 1.70  | 1.77 | 0.17 |
|    |   |      |      |      |      | MEAN | 6.49 | 3.44  | 9.93  | 1.78 | 1.90 |
|    |   |      |      |      | SD   | 0.14 | 0.21 | 0.07  | 0.12  | 0.16 | 0.01 |
| 30 | 1 | 0.37 | 0.61 | 0.79 | SD   | 6.83 | 3.35 | 10.18 | 1.92  | 2.04 | 0.19 |
|    | 2 | 0.38 | 0.63 | 0.80 |      | 6.96 | 3.44 | 10.40 | 1.93  | 2.02 | 0.19 |
|    | 3 | 0.39 | 0.62 | 0.78 |      | 6.84 | 3.76 | 10.59 | 1.69  | 1.82 | 0.16 |
|    |   |      |      |      |      | MEAN | 6.88 | 3.51  | 10.39 | 1.85 | 1.96 |
|    |   |      |      |      | SD   | 0.07 | 0.21 | 0.21  | 0.13  | 0.12 | 0.02 |

**BG-11 Medium**

| EG 11 Medium |         |                    |       |      |             |       |         |       |         |               |      |
|--------------|---------|--------------------|-------|------|-------------|-------|---------|-------|---------|---------------|------|
| Days         | Samples | OD at different nm |       |      | Chl-a       | Chl-b | Chl a+b | Caro  | Chl a/b | Caro/ Chl a+b |      |
|              |         | 652                | 665.2 | 470  |             |       |         |       |         |               |      |
| 0            | 1       | 0.04               | 0.06  | 0.08 | MEAN<br>SD  | 0.64  | 0.47    | 1.11  | 0.13    | 1.38          | 0.11 |
|              | 2       | 0.03               | 0.05  | 0.09 |             | 0.55  | 0.24    | 0.79  | 0.27    | 2.31          | 0.34 |
|              | 3       | 0.04               | 0.05  | 0.07 |             | 0.55  | 0.45    | 1.00  | 0.08    | 1.21          | 0.08 |
|              |         |                    |       | 0.58 |             | 0.39  | 0.97    | 0.16  | 1.63    | 0.18          |      |
|              |         |                    |       | 0.05 |             | 0.13  | 0.16    | 0.10  | 0.59    | 0.14          |      |
| 3            | 1       | 0.10               | 0.17  | 0.23 | MEAN<br>SD  | 1.97  | 0.69    | 2.66  | 0.68    | 2.84          | 0.26 |
|              | 2       | 0.12               | 0.19  | 0.23 |             | 2.02  | 1.27    | 3.29  | 0.43    | 1.59          | 0.13 |
|              | 3       | 0.12               | 0.22  | 0.24 |             | 2.55  | 0.73    | 3.28  | 0.70    | 3.52          | 0.21 |
|              |         |                    |       | 2.18 |             | 0.90  | 3.08    | 0.61  | 2.65    | 0.20          |      |
|              |         |                    |       | 0.32 |             | 0.32  | 0.36    | 0.15  | 0.98    | 0.06          |      |
| 6            | 1       | 0.22               | 0.35  | 0.47 | MEAN<br>SD  | 3.82  | 2.11    | 5.94  | 1.09    | 1.81          | 0.18 |
|              | 2       | 0.22               | 0.35  | 0.44 |             | 3.91  | 2.00    | 5.92  | 1.02    | 1.95          | 0.17 |
|              | 3       | 0.21               | 0.34  | 0.45 |             | 3.74  | 2.01    | 5.75  | 1.06    | 1.86          | 0.18 |
|              |         |                    |       | 3.82 |             | 2.04  | 5.87    | 1.06  | 1.87    | 0.18          |      |
|              |         |                    |       | 0.09 |             | 0.06  | 0.10    | 0.03  | 0.07    | 0.01          |      |
| 9            | 1       | 0.33               | 0.53  | 0.65 | MEAN<br>SD  | 5.90  | 2.97    | 8.87  | 1.48    | 1.99          | 0.17 |
|              | 2       | 0.32               | 0.53  | 0.65 |             | 5.83  | 2.95    | 8.78  | 1.51    | 1.97          | 0.17 |
|              | 3       | 0.32               | 0.52  | 0.65 |             | 5.79  | 2.91    | 8.70  | 1.51    | 1.99          | 0.17 |
|              |         |                    |       | 5.84 |             | 2.94  | 8.78    | 1.50  | 1.98    | 0.17          |      |
|              |         |                    |       | 0.06 |             | 0.03  | 0.08    | 0.02  | 0.01    | 0.00          |      |
| 12           | 1       | 0.38               | 0.64  | 0.76 | MEAN<br>STD | 7.24  | 3.23    | 10.47 | 1.84    | 2.24          | 0.18 |
|              | 2       | 0.40               | 0.66  | 0.76 |             | 7.35  | 3.49    | 10.84 | 1.73    | 2.10          | 0.16 |
|              | 3       | 0.38               | 0.64  | 0.75 |             | 7.16  | 3.31    | 10.47 | 1.77    | 2.16          | 0.17 |
|              |         |                    |       | 7.25 |             | 3.34  | 10.59   | 1.78  | 2.17    | 0.17          |      |
|              |         |                    |       | 0.09 |             | 0.14  | 0.22    | 0.05  | 0.07    | 0.01          |      |
| 15           | 1       | 0.46               | 0.78  | 0.83 | MEAN        | 8.86  | 3.68    | 12.54 | 1.93    | 2.41          | 0.15 |
|              | 2       | 0.45               | 0.77  | 0.84 |             | 8.76  | 3.59    | 12.35 | 2.02    | 2.44          | 0.16 |
|              | 3       | 0.45               | 0.77  | 0.83 |             | 8.74  | 3.56    | 12.30 | 2.02    | 2.46          | 0.16 |
|              |         |                    |       | 8.79 |             | 3.61  | 12.40   | 1.99  | 2.44    | 0.16          |      |
|              |         |                    |       |      |             |       |         |       |         |               |      |



|           |   |      |      |      |             |              |             |              |             |             |             |
|-----------|---|------|------|------|-------------|--------------|-------------|--------------|-------------|-------------|-------------|
| <b>18</b> | 1 | 0.49 | 0.84 | 0.94 | <b>SD</b>   | <b>0.06</b>  | <b>0.06</b> | <b>0.13</b>  | <b>0.06</b> | <b>0.03</b> | <b>0.01</b> |
|           |   |      |      |      |             | 9.53         | 3.87        | 13.40        | 2.34        | 2.46        | 0.17        |
|           |   |      |      |      |             | 9.28         | 4.48        | 13.76        | 2.12        | 2.07        | 0.15        |
|           |   |      |      |      |             | 9.54         | 4.06        | 13.60        | 2.26        | 2.35        | 0.17        |
| <b>21</b> | 1 | 0.54 | 0.89 | 1.06 | <b>MEAN</b> | <b>9.45</b>  | <b>4.14</b> | <b>13.59</b> | <b>2.24</b> | <b>2.29</b> | <b>0.16</b> |
|           |   |      |      |      |             | <b>0.15</b>  | <b>0.31</b> | <b>0.18</b>  | <b>0.11</b> | <b>0.20</b> | <b>0.01</b> |
|           |   |      |      |      |             | 9.97         | 4.73        | 14.70        | 2.47        | 2.11        | 0.17        |
|           |   |      |      |      |             | 10.09        | 4.23        | 14.32        | 2.66        | 2.39        | 0.19        |
| <b>24</b> | 1 | 0.57 | 0.93 | 1.09 | <b>STD</b>  | 9.94         | 4.83        | 14.77        | 2.44        | 2.06        | 0.16        |
|           |   |      |      |      |             | <b>10.00</b> | <b>4.59</b> | <b>14.60</b> | <b>2.52</b> | <b>2.18</b> | <b>0.17</b> |
|           |   |      |      |      |             | <b>0.08</b>  | <b>0.32</b> | <b>0.24</b>  | <b>0.12</b> | <b>0.18</b> | <b>0.01</b> |
|           |   |      |      |      |             | 10.32        | 5.15        | 15.47        | 2.42        | 2.00        | 0.16        |
| <b>27</b> | 1 | 0.59 | 0.98 | 1.13 | <b>MEAN</b> | 10.66        | 4.28        | 14.93        | 2.81        | 2.49        | 0.19        |
|           |   |      |      |      |             | 10.64        | 4.70        | 15.35        | 2.57        | 2.26        | 0.17        |
|           |   |      |      |      |             | <b>10.54</b> | <b>4.71</b> | <b>15.25</b> | <b>2.60</b> | <b>2.25</b> | <b>0.17</b> |
|           |   |      |      |      |             | <b>0.19</b>  | <b>0.44</b> | <b>0.28</b>  | <b>0.20</b> | <b>0.24</b> | <b>0.02</b> |
| <b>30</b> | 1 | 0.59 | 0.99 | 1.18 | <b>SD</b>   | 11.01        | 5.09        | 16.10        | 2.63        | 2.16        | 0.16        |
|           |   |      |      |      |             | 11.19        | 5.08        | 16.27        | 2.65        | 2.20        | 0.16        |
|           |   |      |      |      |             | 10.97        | 4.84        | 15.81        | 2.82        | 2.27        | 0.18        |
|           |   |      |      |      |             | <b>11.06</b> | <b>5.00</b> | <b>16.06</b> | <b>2.70</b> | <b>2.21</b> | <b>0.17</b> |
| <b>33</b> | 1 | 0.59 | 0.99 | 1.18 | <b>MEAN</b> | <b>0.11</b>  | <b>0.14</b> | <b>0.23</b>  | <b>0.11</b> | <b>0.05</b> | <b>0.01</b> |
|           |   |      |      |      |             | 11.08        | 5.15        | 16.23        | 2.80        | 2.15        | 0.17        |
|           |   |      |      |      |             | 11.38        | 5.00        | 16.39        | 2.82        | 2.28        | 0.17        |
|           |   |      |      |      |             | 11.06        | 5.45        | 16.51        | 2.63        | 2.03        | 0.16        |
| <b>36</b> | 1 | 0.60 | 1.01 | 1.17 | <b>SD</b>   | <b>11.17</b> | <b>5.20</b> | <b>16.38</b> | <b>2.75</b> | <b>2.15</b> | <b>0.17</b> |
|           |   |      |      |      |             | <b>0.18</b>  | <b>0.23</b> | <b>0.14</b>  | <b>0.10</b> | <b>0.12</b> | <b>0.01</b> |
|           |   |      |      |      |             | 11.06        | 5.45        | 16.51        | 2.63        | 2.03        | 0.16        |
|           |   |      |      |      |             | <b>11.17</b> | <b>5.20</b> | <b>16.38</b> | <b>2.75</b> | <b>2.15</b> | <b>0.17</b> |

#### CFTRI Medium

| Days | Samples | OD at different nm |       |      | Chl-a | Chl-b | Chl a+b | Caro | Chl a/b | Caro/ Chl a+b |      |
|------|---------|--------------------|-------|------|-------|-------|---------|------|---------|---------------|------|
|      |         | 652.4              | 665.2 | 470  |       |       |         |      |         |               |      |
| 0    | 1       | 0.03               | 0.06  | 0.07 | 0.75  | 0.06  | 0.81    | 0.27 | 13.34   | 0.33          |      |
|      | 2       | 0.04               | 0.05  | 0.08 | 0.41  | 0.57  | 0.99    | 0.08 | 0.72    | 0.08          |      |
|      | 3       | 0.04               | 0.06  | 0.07 | 0.59  | 0.39  | 0.98    | 0.14 | 1.52    | 0.15          |      |
|      |         |                    |       |      | MEAN  | 0.59  | 0.34    | 0.92 | 0.17    | 5.20          | 0.19 |
|      |         |                    |       |      | SD    | 0.17  | 0.26    | 0.10 | 0.10    | 7.07          | 0.13 |
| 3    | 1       | 0.10               | 0.16  | 0.20 | 1.75  | 0.89  | 2.65    | 0.45 | 1.96    | 0.17          |      |
|      | 2       | 0.09               | 0.17  | 0.20 | 2.00  | 0.41  | 2.41    | 0.70 | 4.82    | 0.29          |      |
|      | 3       | 0.11               | 0.15  | 0.21 | 1.51  | 1.32  | 2.83    | 0.29 | 1.15    | 0.10          |      |
|      |         |                    |       |      | MEAN  | 1.75  | 0.87    | 2.63 | 0.48    | 2.64          | 0.19 |
|      |         |                    |       |      | SD    | 0.24  | 0.45    | 0.21 | 0.20    | 1.93          | 0.09 |
| 6    | 1       | 0.15               | 0.27  | 0.33 | 3.15  | 0.90  | 4.05    | 1.03 | 3.50    | 0.26          |      |
|      | 2       | 0.17               | 0.27  | 0.34 | 3.03  | 1.52  | 4.56    | 0.78 | 1.99    | 0.17          |      |
|      | 3       | 0.16               | 0.28  | 0.33 | 3.21  | 1.05  | 4.26    | 0.95 | 3.05    | 0.22          |      |
|      |         |                    |       |      | MEAN  | 3.13  | 1.16    | 4.29 | 0.92    | 2.85          | 0.22 |
|      |         |                    |       |      | SD    | 0.09  | 0.32    | 0.25 | 0.13    | 0.77          | 0.04 |
| 9    | 1       | 0.22               | 0.35  | 0.49 | 3.85  | 2.24  | 6.09    | 1.11 | 1.72    | 0.18          |      |
|      | 2       | 0.24               | 0.37  | 0.49 | 4.00  | 2.44  | 6.44    | 1.04 | 1.64    | 0.16          |      |
|      | 3       | 0.21               | 0.36  | 0.48 | 4.06  | 1.64  | 5.70    | 1.37 | 2.48    | 0.24          |      |
|      |         |                    |       |      | MEAN  | 3.97  | 2.11    | 6.08 | 1.18    | 1.95          | 0.20 |
|      |         |                    |       |      | SD    | 0.11  | 0.42    | 0.37 | 0.18    | 0.47          | 0.04 |
| 12   | 1       | 0.28               | 0.42  | 0.58 | 4.54  | 2.98  | 7.51    | 1.19 | 1.52    | 0.16          |      |
|      | 2       | 0.27               | 0.43  | 0.57 | 4.75  | 2.55  | 7.30    | 1.32 | 1.86    | 0.18          |      |
|      | 3       | 0.27               | 0.44  | 0.58 | 4.90  | 2.34  | 7.24    | 1.46 | 2.09    | 0.20          |      |
|      |         |                    |       |      | MEAN  | 4.73  | 2.62    | 7.35 | 1.32    | 1.83          | 0.18 |

|    |   |      |      |      |      |      |      |       |      |      |      |
|----|---|------|------|------|------|------|------|-------|------|------|------|
| 15 | 1 | 0.31 | 0.48 | 0.69 | SD   | 0.18 | 0.33 | 0.15  | 0.14 | 0.29 | 0.02 |
|    | 2 | 0.29 | 0.49 | 0.67 |      | 5.16 | 3.23 | 8.39  | 1.54 | 1.60 | 0.18 |
|    | 3 | 0.29 | 0.47 | 0.66 |      | 5.42 | 2.61 | 8.03  | 1.77 | 2.07 | 0.22 |
|    |   |      |      |      |      | 5.16 | 2.82 | 7.98  | 1.61 | 1.83 | 0.20 |
|    |   |      |      |      | MEAN | 5.25 | 2.89 | 8.13  | 1.64 | 1.83 | 0.20 |
| 18 | 1 | 0.32 | 0.52 | 0.72 | SD   | 0.15 | 0.31 | 0.23  | 0.12 | 0.24 | 0.02 |
|    | 2 | 0.31 | 0.51 | 0.72 |      | 5.72 | 3.03 | 8.75  | 1.79 | 1.89 | 0.20 |
|    | 3 | 0.32 | 0.51 | 0.72 |      | 5.63 | 2.93 | 8.56  | 1.81 | 1.93 | 0.21 |
|    |   |      |      |      |      | 5.66 | 3.04 | 8.69  | 1.78 | 1.86 | 0.20 |
|    |   |      |      |      | MEAN | 5.67 | 3.00 | 8.67  | 1.80 | 1.89 | 0.21 |
| 21 | 1 | 0.36 | 0.59 | 0.77 | SD   | 0.05 | 0.06 | 0.10  | 0.02 | 0.03 | 0.00 |
|    | 2 | 0.35 | 0.58 | 0.78 |      | 6.51 | 3.41 | 9.92  | 1.81 | 1.91 | 0.18 |
|    | 3 | 0.37 | 0.59 | 0.77 |      | 6.45 | 3.13 | 9.58  | 1.99 | 2.06 | 0.21 |
|    |   |      |      |      |      | 6.40 | 3.64 | 10.04 | 1.72 | 1.76 | 0.17 |
|    |   |      |      |      | MEAN | 6.45 | 3.39 | 9.85  | 1.84 | 1.91 | 0.19 |
| 24 | 1 | 0.39 | 0.66 | 0.81 | SD   | 0.06 | 0.25 | 0.24  | 0.14 | 0.15 | 0.02 |
|    | 2 | 0.40 | 0.66 | 0.82 |      | 7.39 | 3.36 | 10.74 | 2.01 | 2.20 | 0.19 |
|    | 3 | 0.41 | 0.66 | 0.82 |      | 7.36 | 3.51 | 10.87 | 1.97 | 2.09 | 0.18 |
|    |   |      |      |      |      | 7.27 | 3.87 | 11.15 | 1.81 | 1.88 | 0.16 |
|    |   |      |      |      | MEAN | 7.34 | 3.58 | 10.92 | 1.93 | 2.06 | 0.18 |
| 27 | 1 | 0.41 | 0.69 | 0.87 | SD   | 0.06 | 0.26 | 0.21  | 0.10 | 0.16 | 0.01 |
|    | 2 | 0.42 | 0.70 | 0.88 |      | 7.72 | 3.46 | 11.18 | 2.23 | 2.23 | 0.20 |
|    | 3 | 0.42 | 0.69 | 0.87 |      | 7.80 | 3.60 | 11.40 | 2.20 | 2.17 | 0.19 |
|    |   |      |      |      |      | 7.68 | 3.76 | 11.44 | 2.10 | 2.05 | 0.18 |
|    |   |      |      |      | MEAN | 7.74 | 3.60 | 11.34 | 2.18 | 2.15 | 0.19 |
| 30 | 1 | 0.43 | 0.71 | 0.90 | SD   | 0.06 | 0.15 | 0.14  | 0.07 | 0.09 | 0.01 |
|    | 2 | 0.43 | 0.73 | 0.92 |      | 7.92 | 3.90 | 11.82 | 2.16 | 2.03 | 0.18 |
|    | 3 | 0.44 | 0.71 | 0.91 |      | 8.19 | 3.55 | 11.74 | 2.41 | 2.31 | 0.21 |
|    |   |      |      |      |      | 7.85 | 4.22 | 12.07 | 2.06 | 1.86 | 0.17 |
|    |   |      |      |      | MEAN | 7.99 | 3.89 | 11.88 | 2.21 | 2.07 | 0.19 |
|    |   |      |      |      | SD   | 0.18 | 0.34 | 0.17  | 0.18 | 0.23 | 0.02 |

#### Zarrouk's Medium

| Days | Samples | OD at different nm |      |      | Chl-a       | Chl-b      | Chl a+b | Caro | Chl a/b | Caro/<br>Chl a+b |      |      |
|------|---------|--------------------|------|------|-------------|------------|---------|------|---------|------------------|------|------|
|      |         | 652                | 665  | 470  |             |            |         |      |         |                  |      |      |
| 0    | 1       | 0.03               | 0.04 | 0.07 | MEAN<br>SD  | 0.43       | 0.43    | 0.86 | 0.10    | 0.98             | 0.11 |      |
|      | 2       | 0.03               | 0.06 | 0.08 |             | 0.73       | 0.18    | 0.92 | 0.27    | 4.01             | 0.30 |      |
|      | 3       | 0.04               | 0.06 | 0.07 |             | 0.56       | 0.49    | 1.05 | 0.09    | 1.15             | 0.09 |      |
|      |         |                    |      | 0.57 |             | 0.37       | 0.94    | 0.15 | 2.05    | 0.17             |      |      |
|      |         |                    |      | 0.15 |             | 0.16       | 0.10    | 0.10 | 1.70    | 0.12             |      |      |
| 3    | 1       | 0.10               | 0.16 | 0.22 |             | MEAN<br>SD | 1.80    | 0.85 | 2.65    | 0.57             | 2.13 | 0.22 |
|      | 2       | 0.11               | 0.16 | 0.21 |             |            | 1.66    | 1.18 | 2.84    | 0.36             | 1.41 | 0.12 |
|      | 3       | 0.09               | 0.17 | 0.21 |             |            | 1.93    | 0.58 | 2.51    | 0.66             | 3.31 | 0.27 |
|      |         |                    |      | 1.80 |             |            | 0.87    | 2.67 | 0.53    | 2.28             | 0.20 |      |
|      |         |                    |      | 0.13 | 0.30        |            | 0.17    | 0.16 | 0.96    | 0.07             |      |      |
| 6    | 1       | 0.18               | 0.32 | 0.35 | MEAN<br>STD |            | 3.64    | 1.38 | 5.02    | 0.92             | 2.64 | 0.18 |
|      | 2       | 0.18               | 0.31 | 0.35 |             |            | 3.60    | 1.29 | 4.89    | 0.94             | 2.80 | 0.19 |
|      | 3       | 0.17               | 0.31 | 0.33 |             |            | 3.57    | 1.14 | 4.71    | 0.92             | 3.13 | 0.20 |
|      |         |                    |      | 3.60 |             |            | 1.27    | 4.87 | 0.93    | 2.86             | 0.19 |      |
|      |         |                    |      | 0.04 |             | 0.12       | 0.16    | 0.01 | 0.25    | 0.01             |      |      |
| 9    | 1       | 0.26               | 0.42 | 0.51 |             | MEAN       | 4.74    | 2.23 | 6.97    | 1.21             | 2.12 | 0.17 |
|      | 2       | 0.26               | 0.42 | 0.52 |             |            | 4.65    | 2.36 | 7.01    | 1.18             | 1.97 | 0.17 |
|      | 3       | 0.25               | 0.43 | 0.53 |             |            | 4.86    | 1.96 | 6.82    | 1.42             | 2.47 | 0.21 |
|      |         |                    |      | 4.75 |             |            | 2.18    | 6.93 | 1.27    | 2.19             | 0.18 |      |

|           |   |      |      |      |             |             |             |             |             |             |             |
|-----------|---|------|------|------|-------------|-------------|-------------|-------------|-------------|-------------|-------------|
| <b>12</b> | 1 | 0.33 | 0.53 | 0.65 | <b>SD</b>   | <b>0.10</b> | <b>0.20</b> | <b>0.10</b> | <b>0.13</b> | <b>0.26</b> | <b>0.02</b> |
|           | 2 | 0.32 | 0.53 | 0.65 |             | 5.80        | 3.06        | 8.86        | 1.45        | 1.90        | 0.16        |
|           | 3 | 0.32 | 0.53 | 0.66 |             | 5.96        | 2.76        | 8.72        | 1.56        | 2.16        | 0.18        |
|           |   |      |      |      | <b>MEAN</b> | 5.90        | 2.86        | 8.76        | 1.59        | 2.06        | 0.18        |
| <b>15</b> | 1 | 0.37 | 0.61 | 0.74 | <b>SD</b>   | <b>0.08</b> | <b>0.15</b> | <b>0.07</b> | <b>0.07</b> | <b>0.13</b> | <b>0.01</b> |
|           | 2 | 0.37 | 0.62 | 0.75 |             | 6.77        | 3.41        | 10.18       | 1.67        | 1.98        | 0.16        |
|           | 3 | 0.36 | 0.60 | 0.74 |             | 6.90        | 3.18        | 10.08       | 1.84        | 2.17        | 0.18        |
|           |   |      |      |      | <b>MEAN</b> | 6.68        | 3.20        | 9.89        | 1.79        | 2.09        | 0.18        |
| <b>18</b> | 1 | 0.38 | 0.66 | 0.81 | <b>SD</b>   | <b>0.11</b> | <b>0.13</b> | <b>0.15</b> | <b>0.09</b> | <b>0.09</b> | <b>0.01</b> |
|           | 2 | 0.41 | 0.65 | 0.79 |             | 7.53        | 2.92        | 10.45       | 2.20        | 2.58        | 0.21        |
|           | 3 | 0.40 | 0.67 | 0.80 |             | 7.07        | 4.11        | 11.18       | 1.57        | 1.72        | 0.14        |
|           |   |      |      |      | <b>MEAN</b> | 7.48        | 3.37        | 10.85       | 1.94        | 2.22        | 0.18        |
| <b>21</b> | 1 | 0.45 | 0.74 | 0.87 | <b>SD</b>   | <b>0.25</b> | <b>0.60</b> | <b>0.37</b> | <b>0.32</b> | <b>0.43</b> | <b>0.04</b> |
|           | 2 | 0.44 | 0.73 | 0.88 |             | 8.14        | 4.21        | 12.35       | 1.88        | 1.93        | 0.15        |
|           | 3 | 0.44 | 0.74 | 0.90 |             | 8.15        | 3.89        | 12.04       | 2.09        | 2.09        | 0.17        |
|           |   |      |      |      | <b>MEAN</b> | 8.34        | 3.64        | 11.98       | 2.27        | 2.29        | 0.19        |
| <b>24</b> | 1 | 0.45 | 0.77 | 0.93 | <b>SD</b>   | <b>0.12</b> | <b>0.29</b> | <b>0.20</b> | <b>0.20</b> | <b>0.18</b> | <b>0.02</b> |
|           | 2 | 0.47 | 0.76 | 0.93 |             | 8.70        | 3.67        | 12.37       | 2.39        | 2.37        | 0.19        |
|           | 3 | 0.47 | 0.76 | 0.92 |             | 8.28        | 4.62        | 12.90       | 1.97        | 1.79        | 0.15        |
|           |   |      |      |      | <b>MEAN</b> | 8.46        | 4.33        | 12.79       | 2.05        | 1.95        | 0.16        |
| <b>27</b> | 1 | 0.48 | 0.77 | 0.98 | <b>SD</b>   | <b>0.21</b> | <b>0.49</b> | <b>0.28</b> | <b>0.22</b> | <b>0.30</b> | <b>0.02</b> |
|           | 2 | 0.47 | 0.78 | 0.99 |             | 8.40        | 4.69        | 13.09       | 2.13        | 1.79        | 0.16        |
|           | 3 | 0.48 | 0.77 | 0.99 |             | 8.62        | 4.32        | 12.93       | 2.35        | 2.00        | 0.18        |
|           |   |      |      |      | <b>MEAN</b> | 8.55        | 4.48        | 13.03       | 2.28        | 1.91        | 0.18        |
| <b>30</b> | 1 | 0.47 | 0.77 | 1.01 | <b>SD</b>   | <b>0.11</b> | <b>0.19</b> | <b>0.08</b> | <b>0.12</b> | <b>0.10</b> | <b>0.01</b> |
|           | 2 | 0.48 | 0.78 | 1.01 |             | 8.49        | 4.40        | 12.90       | 2.41        | 1.93        | 0.19        |
|           | 3 | 0.48 | 0.77 | 1.00 |             | 8.64        | 4.50        | 13.14       | 2.37        | 1.92        | 0.18        |
|           |   |      |      |      | <b>MEAN</b> | 8.49        | 4.62        | 13.10       | 2.28        | 1.84        | 0.17        |
|           |   |      |      |      | <b>SD</b>   | <b>0.09</b> | <b>0.11</b> | <b>0.13</b> | <b>0.07</b> | <b>0.05</b> | <b>0.01</b> |

**Table S5. Calculation of dry cell biomass and biomass productivity of *Scenedesmus rotundus*-MG910488 under different growth medium.**

| <b>Biomass Content (mgL<sup>-1</sup>)</b>                     |           |           |           |             |           |                   |
|---------------------------------------------------------------|-----------|-----------|-----------|-------------|-----------|-------------------|
| <b>Different Media</b>                                        | <b>T1</b> | <b>T2</b> | <b>T3</b> | <b>Mean</b> | <b>SD</b> | <b>Final Data</b> |
| <b>BBM</b>                                                    | 267.57    | 242.61    | 238.29    | 249.49      | 15.81     | 249.49±15.81      |
| <b>CHU-10</b>                                                 | 384.17    | 377.81    | 356.24    | 372.74      | 14.64     | 372.74±14.64      |
| <b>Fogg's</b>                                                 | 463.29    | 489.37    | 457.61    | 470.09      | 16.94     | 470.09±16.94      |
| <b>CFTRI</b>                                                  | 572.87    | 534.25    | 557.63    | 554.92      | 19.45     | 554.92±19.45      |
| <b>BG-11</b>                                                  | 717.23    | 674.68    | 693.55    | 695.15      | 21.32     | 695.15±21.32      |
| <b>Zarrouk's</b>                                              | 754.13    | 769.57    | 739.98    | 754.56      | 14.80     | 754.56±14.80      |
| <b>Biomass Productivity (mgL<sup>-1</sup> d<sup>-1</sup>)</b> |           |           |           |             |           |                   |
| <b>Different Media</b>                                        | <b>T1</b> | <b>T2</b> | <b>T3</b> | <b>Mean</b> | <b>SD</b> | <b>Final Data</b> |
| <b>BBM</b>                                                    | 13.38     | 12.131    | 11.91     | 12.47       | 0.79      | 12.47±0.79        |
| <b>CHU-10</b>                                                 | 19.21     | 18.891    | 17.81     | 18.64       | 0.73      | 18.64±0.73        |
| <b>Fogg's</b>                                                 | 23.16     | 24.469    | 22.88     | 23.50       | 0.85      | 23.50±0.85        |
| <b>CFTRI</b>                                                  | 28.64     | 26.713    | 27.88     | 27.75       | 0.97      | 27.75±0.97        |
| <b>BG-11</b>                                                  | 35.86     | 33.734    | 34.68     | 34.76       | 1.07      | 34.76±1.07        |

|                  |       |        |       |       |      |            |
|------------------|-------|--------|-------|-------|------|------------|
| <b>Zarrouk's</b> | 37.71 | 38.479 | 37.00 | 37.73 | 0.74 | 37.73±0.74 |
|------------------|-------|--------|-------|-------|------|------------|

**Table S6. Estimation of the Lipid content and DCW lipid percentage of *Scenedesmus rotundus*-MG910488**

Extraction of lipid was done by the method of Bligh and Dyer 1959, the amount of total lipid content was estimated gravimetrically.

Weight of lipid (mg L<sup>-1</sup>) = Dry weight of vial containing lipid (W2) -Pre weight of vial (W1)

Lipid % = (Weight of lipid X 100)/ Weight of dry biomass was taken for the lipid extraction.

| <b>Lipid (mg L<sup>-1</sup>)</b> |           |           |           |              |           |                   |
|----------------------------------|-----------|-----------|-----------|--------------|-----------|-------------------|
| <b>Different Media</b>           | <b>T1</b> | <b>T2</b> | <b>T3</b> | <b>Means</b> | <b>SD</b> | <b>Final Data</b> |
| <b>BBM</b>                       | 40.92     | 33.89     | 35.29     | 36.70        | 3.72      | 36.70±3.72        |
| <b>CHU-10</b>                    | 84.74     | 89.12     | 81.29     | 85.05        | 3.92      | 85.05±3.92        |
| <b>Fogg's</b>                    | 88.85     | 97.62     | 100.45    | 95.64        | 6.05      | 95.64±6.05        |
| <b>CFTRI</b>                     | 161.03    | 159.20    | 154.10    | 158.11       | 3.59      | 158.11±3.59       |
| <b>BG-11</b>                     | 242.28    | 230.67    | 222.53    | 231.83       | 9.93      | 231.83±9.93       |
| <b>Zarrouk's</b>                 | 229.78    | 237.72    | 234.59    | 234.03       | 4.00      | 234.03±4.00       |
| <b>Lipid Content %</b>           |           |           |           |              |           |                   |
| <b>Different Media</b>           | <b>T1</b> | <b>T2</b> | <b>T3</b> | <b>Means</b> | <b>SD</b> | <b>Final Data</b> |
| <b>BBM</b>                       | 15.29     | 13.97     | 14.81     | 14.69        | 0.67      | 14.81±0.67        |
| <b>CHU-10</b>                    | 22.06     | 23.59     | 21.81     | 22.49        | 0.96      | 22.49±0.96        |

|                  |       |       |       |       |      |            |
|------------------|-------|-------|-------|-------|------|------------|
| <b>Fogg's</b>    | 19.18 | 19.95 | 21.37 | 20.17 | 1.11 | 20.17±1.11 |
| <b>CFTRI</b>     | 28.11 | 29.8  | 27.77 | 28.56 | 1.09 | 28.56±1.09 |
| <b>BG-11</b>     | 33.78 | 34.19 | 31.92 | 33.30 | 1.21 | 33.30±1.21 |
| <b>Zarrouk's</b> | 30.47 | 30.89 | 31.09 | 30.82 | 0.32 | 30.82±0.32 |

**Note-** T1, T2 and T3 are the three biologically independent replicates of the experiment and the reported values are the means  $\pm$  standard deviation of three values using Microsoft Office Excel 2010 (Microsoft, USA).

**Figure S1. GCMS of Fatty Acid Methyl Ester sample obtained from *Scenedesmus rotundus*-MG910488**

Sample Information

Analyzed by : \$Admn.\$  
 Analyzed : 4/25/2018 2:41:36 PM  
 Sample Type : \$Organic\$  
 Sample Name : 3-R  
 Method File : D:\GCMS Method\Method\FAME on Rtx-5.qgn

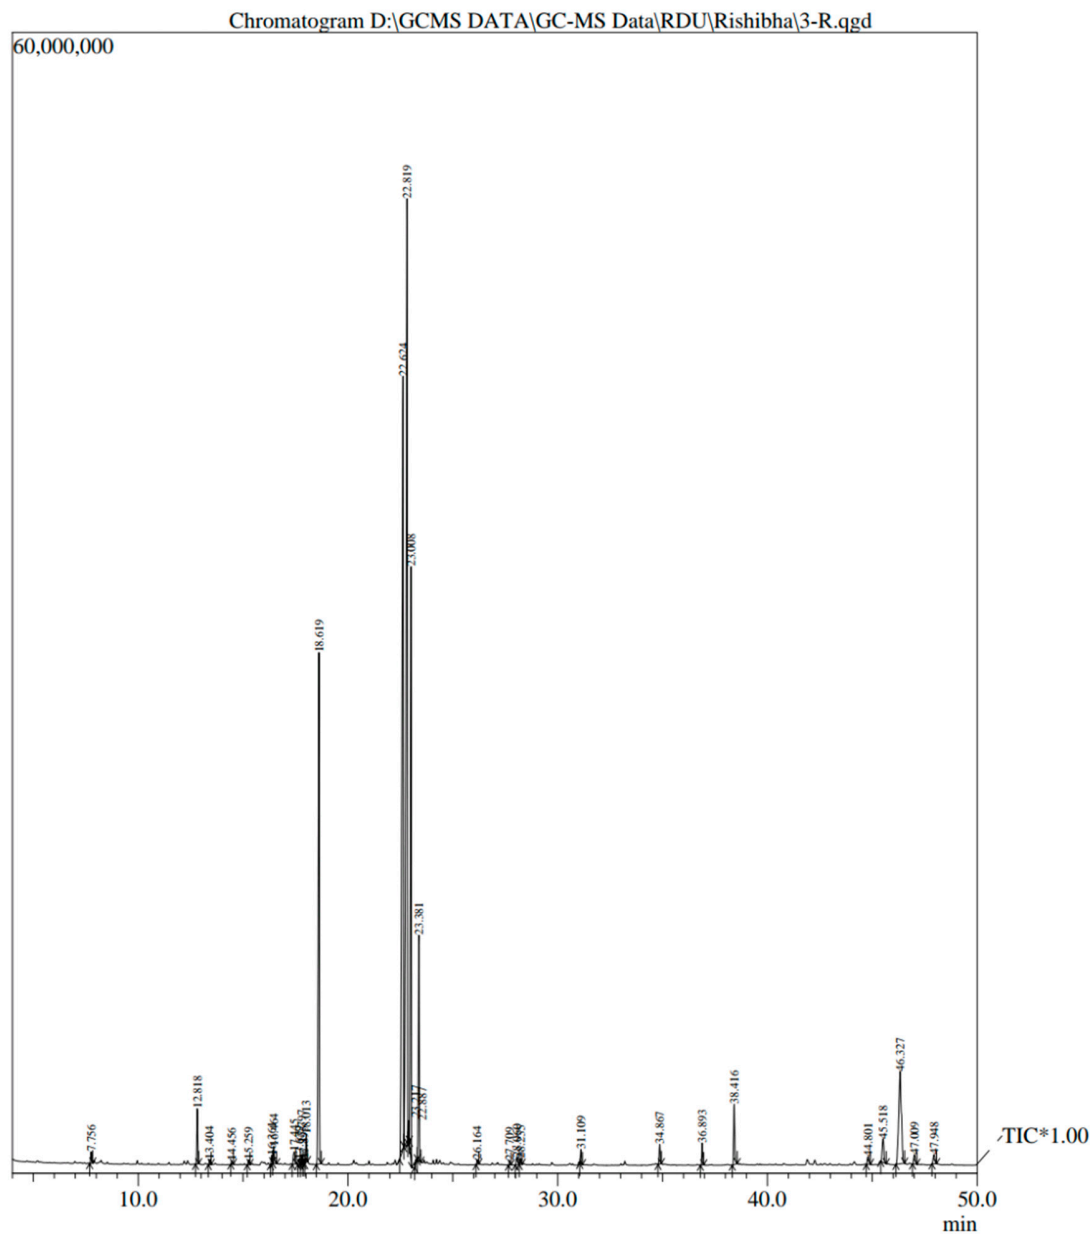

Figure S2. MS fragmentation patterns of fatty acid methyl ester of *Scenedesmus rotundus*-MG910488

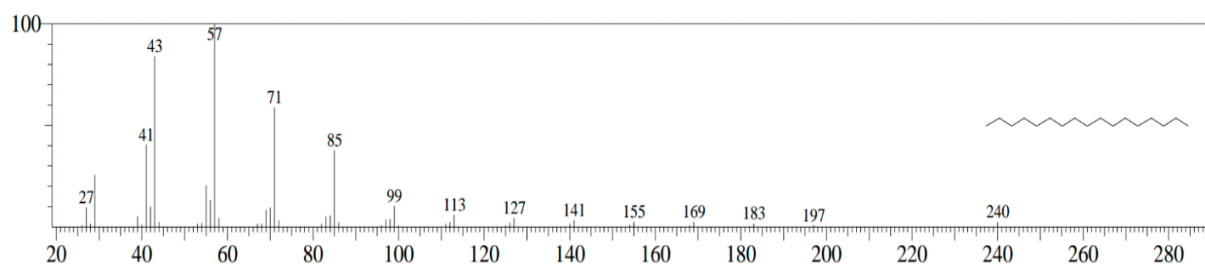

**Figure S2a.** MS fragmentation patterns of Heptadecane

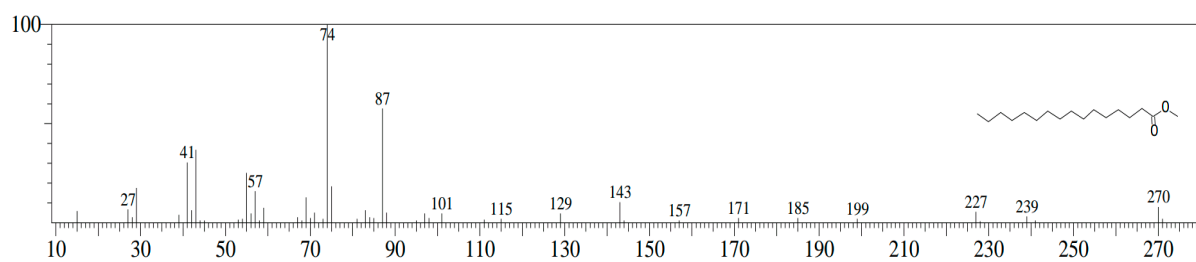

**Figure S2b.** MS fragmentation patterns of Methyl-hexadec-9-enoate

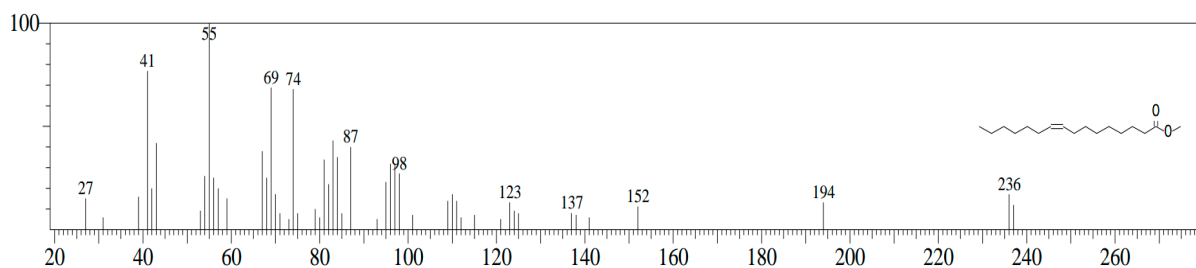

**Figure S2c.** MS fragmentation patterns of 9-hexadecenoic acid methyl ester

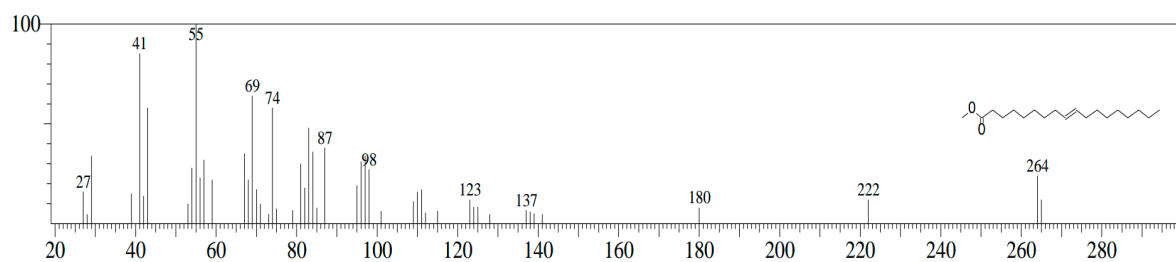

**Figure S2d.** MS fragmentation patterns of 9-octadecenoic acid methyl ester



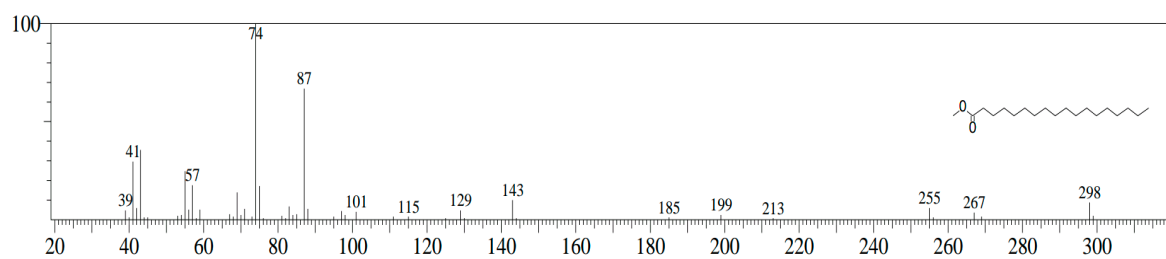

**Figure S2e.** MS fragmentation patterns of methyl stearate methyl ester

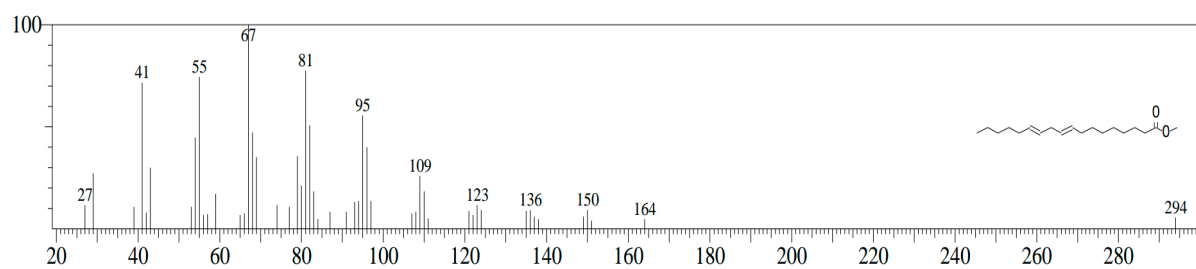

**Figure S2f.** MS fragmentation patterns of methyl octadeca-9,12-dienoate methyl ester

Figure S3. FTIR spectrum of Fatty Acid Methyl Ester sample obtained from the *Scenedesmus rotundus*- MG910488

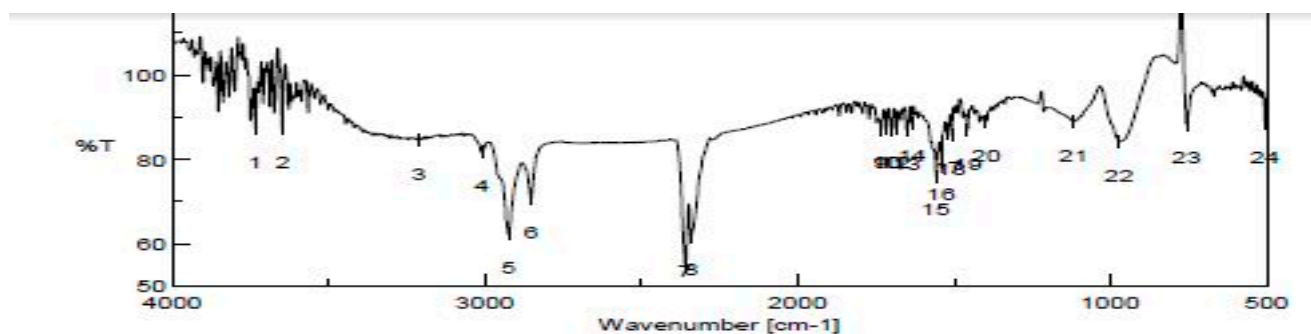

Final-A-Imp.jws

Measurement Information:

Model Name FT/IR-4600typeA  
Serial Number D036581786

Accessory ATR PRO ONE  
Accessory S/N A075061809  
Incident angle 45 deg

Measurement Date 6/11/2018 7:30 PM

Light Source Stancarc  
Detector TCS  
Accumulation 9  
Resolution 4 cm-1  
Zero Filling On  
Apodization Cosine  
Gain Auto (4)  
Aperture Auto (7.1 mm)  
Scanning Speed Auto (2 mm/sec)  
Filter Auto (30000 Hz)

Results of Peak Find

| No. | Position | Intensity |
|-----|----------|-----------|
| 1   | 3734.48  | 87.2972   |
| 2   | 3648.66  | 87.0462   |
| 3   | 3211.86  | 84.4261   |
| 4   | 3011.3   | 81.6383   |
| 5   | 2925.48  | 62.1631   |
| 6   | 2854.13  | 70.5081   |
| 7   | 2859.48  | 54.3381   |
| 8   | 2341.16  | 61.7423   |
| 9   | 1733.69  | 87.0273   |
| 10  | 1716.34  | 87.1835   |
| 11  | 1698.02  | 86.9958   |
| 12  | 1683.55  | 87.2897   |
| 13  | 1652.7   | 86.8864   |
| 14  | 1636.3   | 88.5011   |
| 15  | 1558.2   | 75.8276   |
| 16  | 1540.85  | 79.3926   |
| 17  | 1521.56  | 85.9744   |
| 18  | 1507.1   | 85.6432   |
| 19  | 1456.96  | 86.8988   |
| 20  | 1397.17  | 88.8138   |
| 21  | 1118.51  | 88.8803   |
| 22  | 972.912  | 84.0592   |
| 23  | 755.959  | 88.186    |
| 24  | 506.223  | 88.4314   |
